# Supplementary material for: Mineral Acid Co-Extraction in Reactive Extraction of Lactic Acid Using a Thymol-Menthol Deep Eutectic Solvent as a Green Modifier
Source: MDPI journal article supplement (doi:10.3390/molecules29081722), 2024-04-11
Supplement: s1 [file s1]

# Supplementary materials: Mineral acid co-extraction in reactive extraction of lactic acid using a thymol-menthol deep eutectic solvent as a green modifier

Paul Demmelmayer <sup>1</sup>, Marija Čosić <sup>1</sup> and Marlene Kienberger <sup>1,\*</sup>

<sup>1</sup> Institute of Chemical Engineering and Environmental Technology, Graz University of Technology, Inffeldgasse 25/C 8010 Graz Austria; demmelmayer@tugraz.at; cosic.m@outlook.com.

\* Correspondence: marlene.kienberger@tugraz.at

## Mass balance for the extraction step

The overall mass balances for the extraction step is shown in Equation S1 with the volume ( $V$ ) and acid concentration ( $c$ ) for the feed ( $F$ ), solvent ( $S$ ), raffinate ( $R$ ), and extract ( $E$ ) phases.

$$V_F \cdot c_F + V_S \cdot c_S = V_R \cdot c_R + V_E \cdot c_E \quad (\text{S1})$$

In the next step, Equation S1 is rearranged to Equation S2. Here, the volume of the raffinate phase is replaced by  $V_R = V_F - \Delta V$  and the volume of the extract phase is substituted by  $V_E = V_S + \Delta V$ . The term  $\Delta V$  accounts for the volume change due to water transport from the feed phase into the solvent phase. The volume change because of solvent phase loss into the aqueous phase and acid transport into the solvent phase is neglected.

$$c_E = (V_F \cdot c_F - (V_F - \Delta V) \cdot c_R) / (V_S + \Delta V) \quad (\text{S2})$$

To calculate the volume change  $\Delta V$ , Equation S3 is used using the mass of water contained in the extract phase ( $m_{w,E}$ ), the mass of water contained in the solvent phase ( $m_{w,S}$ ), and the density of water ( $\rho_w$ ).

$$\Delta V = (m_{w,E} - m_{w,S}) / \rho_w \quad (\text{S3})$$

The  $m_{w,S}$  is calculated according to Equation S4 using the total mass of the solvent phase ( $m_S$ ) and the mass fraction of water in the solvent phase ( $w_{w,S}$ ).

$$m_{w,S} = m_S \cdot w_{w,S} \quad (\text{S4})$$

The  $m_{w,E}$  is determined using Equation S5 with the total mass of the extract phase ( $m_E$ ) and the mass fraction of water in the extract phase ( $w_{w,E}$ ).

$$m_{w,E} = m_E \cdot w_{w,E} \quad (\text{S5})$$

As weighing of the extract phase after the experiment results in errors due to the extract phase sticking to the separatory funnel walls,  $m_E$  is calculated according to Equation S6;  $m_{\text{inert},E}$  denotes the mass of the inert part of the extract phase (extract phase without water), and  $w_{\text{inert},E}$  denotes the mass fraction of the inert part of the extract phase.

$$m_E = m_{\text{inert},E} / w_{\text{inert},E} = (m_S - m_{w,S}) / (1 - w_{w,E}) \quad (\text{S6})$$

When compared to the simplified method of assuming a constant phase volumetric phase ratio of one, the presented way of evaluation tackles errors in calculations due to high water transport into to solvent phase, e.g. a change from 0 wt% water in the solvent phase to 10 wt% of water in the extract phase.

---

**Table S1.** The extractant loading ( $z_{acid}$ ) for HCl, HNO<sub>3</sub>, H<sub>2</sub>SO<sub>4</sub>, and H<sub>3</sub>PO<sub>4</sub> for the reactive extraction from the single-acid model solutions using TOA, TOPO, or TBP diluted in 1-octanol, tmDES, or limonene at 25 ± 0.5 °C. The volumetric feed-to-solvent phase ratio was one.

| Extractant | Modifier/<br>diluent | ZHCl            | ZHNO <sub>3</sub> | ZH <sub>2</sub> SO <sub>4</sub> | ZH <sub>3</sub> PO <sub>4</sub> |
|------------|----------------------|-----------------|-------------------|---------------------------------|---------------------------------|
| TOA        | 1-Octanol            | 2.07 ± 0.00     | 2.01 ± 0.00       | 2.02 ± 0.00                     | 2.09 ± 0.00                     |
|            | tmDES                | 1.31 ± 0.01     | 1.27 ± 0.01       | 0.984 ± 0.001                   | 0.658 ± 0.012                   |
|            | Limonene             | 1.20 ± 0.01     | 1.17 ± 0.00       | 0.874 ± 0.006                   | 0.624 ± 0.008                   |
| TOPO       | 1-Octanol            | 0.111 ± 0.003   | 0.160 ± 0.009     | 0.131 ± 0.015                   | 0.253 ± 0.003                   |
|            | tmDES                | 0.0455 ± 0.0103 | 0.0513 ± 0.0142   | 0.183 ± 0.004                   | 0.238 ± 0.028                   |
|            | Limonene             | 0.0514 ± 0.0022 | 0.171 ± 0.001     | 0.0707 ± 0.0100                 | 0.247 ± 0.001                   |
| TBP        | 1-Octanol            | 0.0213 ± 0.0038 | 0.156 ± 0.021     | 0.0938 ± 0.0128                 | 0.250 ± 0.027                   |
|            | tmDES                | 0.163 ± 0.006   | 0.116 ± 0.001     | 0.159 ± 0.005                   | 0.277 ± 0.018                   |
|            | Limonene             | 0.122 ± 0.002   | 0.0923 ± 0.0094   | 0.167 ± 0.008                   | 0.234 ± 0.001                   |

**Table S2.** The extractant loading ( $z_{acid}$ ) for HCl, HNO<sub>3</sub>, H<sub>2</sub>SO<sub>4</sub>, and H<sub>3</sub>PO<sub>4</sub> for the reactive extraction from the multi-acid model solution using TOA, TOPO, or TBP diluted in 1-octanol, tmDES, or limonene at 25 ± 0.5 °C. The volumetric feed-to-solvent phase ratio was one.

| Extractant | Modifier/<br>diluent | ZHCl              | ZHNO <sub>3</sub> | ZH <sub>2</sub> SO <sub>4</sub> | ZH <sub>3</sub> PO <sub>4</sub> |
|------------|----------------------|-------------------|-------------------|---------------------------------|---------------------------------|
| TOA        | 1-Octanol            | 0.337 ± 0.008     | 0.389 ± 0.009     | 0.268 ± 0.005                   | 0.0782 ± 0.0027                 |
|            | tmDES                | 0.329 ± 0.001     | 0.337 ± 0.001     | 0.190 ± 0.001                   | 0.0776 ± 0.0002                 |
|            | Limonene             | 0.277 ± 0.000     | 0.290 ± 0.000     | 0.147 ± 0.001                   | 0.0692 ± 0.0077                 |
| TOPO       | 1-Octanol            | 0.0213 ± 0.0043   | 0.0262 ± 0.0031   | 0.0115 ± 0.0031                 | 0.0190 ± 0.0029                 |
|            | tmDES                | 0.0158 ± 0.0011   | 0.0214 ± 0.0031   | 0.0249 ± 0.0027                 | 0.0218 ± 0.0027                 |
|            | Limonene             | 0.0127 ± 0.0033   | 0.0105 ± 0.0033   | 0.0181 ± 0.0042                 | 0.0183 ± 0.0045                 |
| TBP        | 1-Octanol            | 0.0235 ± 0.0007   | 0.0198 ± 0.0013   | 0.0154 ± 0.0020                 | 0.0183 ± 0.0022                 |
|            | tmDES                | 0.0224 ± 0.0016   | 0.0203 ± 0.0010   | 0.0176 ± 0.0004                 | 0.0115 ± 0.0010                 |
|            | Limonene             | 0.00586 ± 0.00187 | 0.0174 ± 0.0005   | 0.0173 ± 0.0012                 | 0.00795 ± 0.00274               |

**Table S3.** The extractant loading for LA ( $z_{LA}$ ) and the mineral acid ( $z_{\text{mineral}}$ ) for the reactive extraction of LA from a model solution using TOA, TOPO, or TBP diluted in 1-octanol, tmDES, or limonene at  $25 \pm 0.5$  °C. The model solutions contained LA and one mineral acid, and the volumetric feed-to-solvent phase ratio was one.

| Mineral acid                   | Solvent phase | $z_{LA}$            | $z_{\text{mineral}}$ |
|--------------------------------|---------------|---------------------|----------------------|
| HCl                            | TOA:1-octanol | $0.292 \pm 0.004$   | $0.969 \pm 0.002$    |
|                                | TOA:tmDES     | $0.167 \pm 0.003$   | $0.919 \pm 0.011$    |
|                                | TOA:limonene  | $0.102 \pm 0.002$   | $0.878 \pm 0.000$    |
|                                | TOPO:tmDES    | $0.0733 \pm 0.0027$ | $0.0215 \pm 0.0005$  |
| HNO <sub>3</sub>               | TOA:1-octanol | $0.199 \pm 0.005$   | $0.943 \pm 0.002$    |
|                                | TOA:tmDES     | $0.129 \pm 0.005$   | $0.945 \pm 0.000$    |
|                                | TOA:limonene  | $0.0909 \pm 0.0047$ | $0.916 \pm 0.004$    |
|                                | TOPO:tmDES    | $0.0746 \pm 0.0023$ | $0.0235 \pm 0.0007$  |
| H <sub>2</sub> SO <sub>4</sub> | TOA:1-octanol | $0.212 \pm 0.004$   | $0.594 \pm 0.004$    |
|                                | TOA:tmDES     | $0.130 \pm 0.026$   | $0.561 \pm 0.005$    |
|                                | TOA:limonene  | $0.124 \pm 0.002$   | $0.549 \pm 0.010$    |
|                                | TOPO:tmDES    | $0.0819 \pm 0.0038$ | $0.0260 \pm 0.0000$  |
| H <sub>3</sub> PO <sub>4</sub> | TOA:1-octanol | $0.455 \pm 0.002$   | $0.541 \pm 0.009$    |
|                                | TOA:tmDES     | $0.441 \pm 0.003$   | $0.467 \pm 0.003$    |
|                                | TOA:limonene  | $0.112 \pm 0.009$   | $0.184 \pm 0.001$    |
|                                | TOPO:tmDES    | $0.0694 \pm 0.0001$ | $0.0238 \pm 0.0011$  |

**Table S4.** The LA concentration in the extract phase ( $c_{LA,E}$ ) and mineral acid concentration in the extract ( $c_{\text{mineral},E}$ ) for back-extraction experiments. The extract phases were from experiments performed in section 2.4, the extraction temperature was  $25 \pm 0.5$  °C, and the volumetric feed-to-solvent phase ratio was one.

| Mineral acid                   | Solvent phase | $c_{LA,E}$ [mol·L <sup>-1</sup> ] | $c_{\text{mineral},E}$ [mol·L <sup>-1</sup> ] |
|--------------------------------|---------------|-----------------------------------|-----------------------------------------------|
| HCl                            | TOA:1-octanol | $0.0585 \pm 0.0013$               | $0.194 \pm 0.001$                             |
|                                | TOA:tmDES     | $0.0334 \pm 0.0010$               | $0.184 \pm 0.003$                             |
|                                | TOA:limonene  | $0.0204 \pm 0.0005$               | $0.175 \pm 0.000$                             |
|                                | TOPO:tmDES    | $0.0147 \pm 0.0008$               | $0.00429 \pm 0.00013$                         |
| HNO <sub>3</sub>               | TOA:1-octanol | $0.0398 \pm 0.0014$               | $0.189 \pm 0.001$                             |
|                                | TOA:tmDES     | $0.0258 \pm 0.0015$               | $0.189 \pm 0.000$                             |
|                                | TOA:limonene  | $0.0182 \pm 0.0013$               | $0.183 \pm 0.001$                             |
|                                | TOPO:tmDES    | $0.0149 \pm 0.0007$               | $0.00470 \pm 0.00018$                         |
| H <sub>2</sub> SO <sub>4</sub> | TOA:1-octanol | $0.0423 \pm 0.0011$               | $0.119 \pm 0.001$                             |
|                                | TOA:tmDES     | $0.0260 \pm 0.0073$               | $0.112 \pm 0.002$                             |
|                                | TOA:limonene  | $0.0249 \pm 0.0005$               | $0.110 \pm 0.003$                             |
|                                | TOPO:tmDES    | $0.0164 \pm 0.0011$               | $0.00520 \pm 0.00000$                         |
| H <sub>3</sub> PO <sub>4</sub> | TOA:1-octanol | $0.0912 \pm 0.0006$               | $0.108 \pm 0.003$                             |
|                                | TOA:tmDES     | $0.0884 \pm 0.0010$               | $0.0935 \pm 0.0008$                           |
|                                | TOA:limonene  | $0.0224 \pm 0.0027$               | $0.0367 \pm 0.0004$                           |
|                                | TOPO:tmDES    | $0.0139 \pm 0.0000$               | $0.00477 \pm 0.00030$                         |
